# Supplementary material for: Development and Validation of Single Nucleotide Polymorphisms (SNPs) Markers from Two Transcriptome 454-Runs of Turbot (Scophthalmus maximus) Using High-Throughput Genotyping
Source: Int J Mol Sci. 2013 Mar 12;14(3):5694–711. doi: 10.3390/ijms14035694 (PMC3634403; doi:10.3390/ijms14035694)
Supplement: Supplementary File 1 — Supplementary Table (XLSX, 26 KB) [file ijms-14-05694-s001.xlsx]

## Sheet: Full1
Supplementary Table 1. SNP name, annotation, length of the contig (Contig Length), number of true SNPs inside the contig (SNPs Contig), SNP position, external PCR primer sequences (F = forward, R = Reverse), tailed extension primer (showing tails in lower case) and variants detected for each tested marker are showed. Unfeasible SNPs are indicated in red colour.
SNP Name	Annotation	Contig Length	SNPs_Contig	SNP Position	Forward PCR-Primer	Reverse PCR-primer	Extension primer	Variants	Multiplex
SmaSNP_211	Cyclin-dependent kinase 2 interacting protein	1894	2	1236	ACGTTGGATGGCTAGGAGCTGCTTTTCAAC	ACGTTGGATGCTCAGCTCCAGAGAAAATTG	gACCGCAAGATATGAACTGGGTTG	A/T	1
SmaSNP_212	Zona pellucida sperm-binding protein 3	1404	16	774	ACGTTGGATGCCCATATGGGCATGAAAGAG	ACGTTGGATGGCTCAATGAGCAATTGACGG	GGGGACGACGTTTGTCTT	A/G	6
SmaSNP_213	Proteasome activator subunit 3	2410	2	389	ACGTTGGATGCGGAGATAAACCTAACGGTG	ACGTTGGATGTTTTGGTCATTTTGCGCGTC	cGCTCTCAAACCTGAATG	A/G	3
SmaSNP_214	Signal sequence receptor, beta	1180	2	421	ACGTTGGATGGTCAAATGGGACAGGATAGC	ACGTTGGATGAAAGTAACCAGCCTTCAGGG	GGACAGGATAGCACCTGCCAGCAATG	C/T	4
SmaSNP_215	Mitotic specific cyclin-B1	2218	16	903	ACGTTGGATGCCATCACAGGAAGCAAACTC	ACGTTGGATGCTCTTGGATGCTGGAGACTG	tGCAAACTCTCTGCTGTGTA	C/T	2
SmaSNP_216	Pre-mRNA branch site protein p14	930	5	724	ACGTTGGATGAGGAAATAAAGAACCGCAGG	ACGTTGGATGGGAATTCTTCAGCCACAAAC	cccctAACCGCAGGCAAATACTTTG	A/T	1
SmaSNP_217	Zona Pellucida protein C1	1204	5	811	ACGTTGGATGCAAGTTTTCTGTCGACGTAG	ACGTTGGATGGTGTTGTCAAGCCCAAAAGG	ggCTGTCGACGTAGAGGTGTAT	A/G	4
SmaSNP_218	Mitochondrial ribosomal protein S18A	1341	1	980	ACGTTGGATGAACTTGTCGTTCGGAGGAAG	ACGTTGGATGTGTGTTGCGGTCTGTGTGGA	GAAGCCCGCGTTGGTTCCTAATCT	G/T	1
SmaSNP_219	U3 small nucleolar ribonucleoprotein protein IMP3	1339	2	891	ACGTTGGATGTCCAGGCCTTTTGCTTTTTC	ACGTTGGATGTTTTGATGATCCCCCGTCAG	ccTTTTCAATGAACACTTCTCTT	G/T	5
SmaSNP_220	Coatomer subunit epsilon isoform 1	1295	1	923	ACGTTGGATGGAAAGATGCACACAGATCCC	ACGTTGGATGTACTGCAACGCTAGTCTGTC	CACAGATCCCACCCATT	C/T	1
SmaSNP_221	Zona pellucida protein Y1	2619	2	2246	ACGTTGGATGCCAGAGGATATGTACACTGC	ACGTTGGATGGCAAGAAGTTGCGTAGTTGG	CCCCATCAATCTCATTGC	A/G	3
SmaSNP_222	Signal recognition particle 14 kDa protein	1490	6	1010	ACGTTGGATGAATGGGTAGAAATGCGGGTG	ACGTTGGATGGACCGTGGTTACCTTCACTG	taCCATTTCCTCCTCTGATCG	G/T	4
SmaSNP_223	Epithelial cell adhesion protein	1695	13	1084	ACGTTGGATGTCGTAGATGCCGTCGTTGTC	ACGTTGGATGATGTACAGAGCCAAGAAGGG	CTCCTCTGGCTTTCCGCCTACTGAACG	A/T	4
SmaSNP_224	Transcription initiation factor TFIID subunit D11	1441	17	394	ACGTTGGATGCGCAAGGATCAAAGTTGGTG	ACGTTGGATGCCTCAGAGGGTTTAGGGTTC	TCATCCGAGAGGACGAACTCTGC	C/G	4
SmaSNP_225	Acidic ribosomal protein P1	961	2	471	ACGTTGGATGAGACTTCACTCCTCCCTCAA	ACGTTGGATGGATCACAACGATGGATGCAG	gAATATTAAATTCAGTCAGGGGAA	A/G	5
SmaSNP_226	Alcohol dehydrogenase Class-3	1464	8	1130	ACGTTGGATGTTCGGAGGCTGGAAGAGTGT	ACGTTGGATGACTCATCCACCTTCAGCTTC	cGGCTGGAAGAGTGTGGAGAG	C/T	1
SmaSNP_227	Thioredoxin protein 4A	1454	9	557	ACGTTGGATGTTTTCGGCGATGCTGTAGAG	ACGTTGGATGAGTGCTCGTGATCCGCTTC	TAGAGAACCTCGTCCAT	A/G	3
SmaSNP_228	Novel protein similar to vertebrate THAP domain containing 4 (THAP4)	2449	4	482	ACGTTGGATGTCTGGAATGACAAAGGTTGC	ACGTTGGATGGTTGTATAACTGTAGAGCTG	GGTTGCTAAAATAGGAGTCAGAT	A/G	1
SmaSNP_229	Tumor suppressor candidate 2	1211	3	958	ACGTTGGATGCCGTCTTAACACACATTCAC	ACGTTGGATGTGAGACGTAGAGCGTTAGAC	CACACATGTACACATACAAAGACA	A/G	3
SmaSNP_230	Optic atrophy 3 protein	1243	1	675	ACGTTGGATGGTTCAGCCACATGAATAGCC	ACGTTGGATGCTCATGTCCACCTCTTTCAC	CCTGATGACTTCACACATTGTCC	C/T	2
SmaSNP_231	RNA 3'-terminal phosphate cyclase	1293	3	508	ACGTTGGATGTTCTTCATCAGAGGAAGGGC	ACGTTGGATGAAGAACTCTCTGAAGGCCAC	gACAGGTCGACAGTCGGGTCCAC	A/C	4
SmaSNP_232	RAD1 homolog	3598	2	1602	ACGTTGGATGAATCACTCCACCTCCTCGTC	ACGTTGGATGCAGTACCTGGTCAGGAACGA	CTCGTCGGGACAACAGTAATA	A/G	1
SmaSNP_233	Ubiquitin carrier protein	1640	7	413	ACGTTGGATGGTGTATTCTTCTGCCAGGTC	ACGTTGGATGATGCCAAGTGATCCAGTCTC	ATGCTCTGGCTGAGGGTTGTT	G/T	2
SmaSNP_234	chromatin accessibility complex protein 1	1363	9	659	ACGTTGGATGTCCAAGACTCTGTGTTGTTG	ACGTTGGATGATGCGGAAGTGGAAGTGAAG	CTCCACCTGATTTCACAT	A/G	4
SmaSNP_235	Nucleolar protein 16	1146	3	637	ACGTTGGATGTTCTGCACTCGGAGAGAATC	ACGTTGGATGTTCCTCGACTCGCTCGCTG	ctAGCTCCCTCTACTGGACCGTCGG	A/G	5
SmaSNP_236	Isopentenyl-diphosphate Delta-isomerase 1	1707	3	932	ACGTTGGATGTTGAAGAGGAAGGTCTCTGC	ACGTTGGATGGATGTTGAACAAGGCCAAGC	GCGATGAGGCTGAACCA	C/G	5
SmaSNP_237	Ran-specific GTPase-activating protein	1980	14	775	ACGTTGGATGGATTCATAATGCACCTCCAC	ACGTTGGATGGGAGAGGATAATGTAGCCTG	GCACCTCCACCACACCT	G/T	5
SmaSNP_238	Forkhead box H1	1482	2	676	ACGTTGGATGAGGAGCAGACAGTCGAAGC	ACGTTGGATGTCGCATCGGATCTGAACAGC	aCCTCTCCCCTCTCCTGACCCTGCG	A/G	2
SmaSNP_239	Stathmin	1333	7	241	ACGTTGGATGTACAGAGAGAAGTCATGTGC	ACGTTGGATGCTAGTTTGCTCCTGCAGGTC	CATATTAATACAAAAGCTAAAATCAG	C/T	5
SmaSNP_240	Ubiquinol-cytochrome c reductase core I protein	1891	6	1071	ACGTTGGATGAGGAGAACCTGTGTCACAGC	ACGTTGGATGGTGACAAAGTGAATGCCCAG	CCTTTCACTCCTCATACAG	C/T	1
SmaSNP_241	BolA-like protein 3	1149	5	590	ACGTTGGATGTCCCCTTTGTTCACAGTAGC	ACGTTGGATGACAGGCACACCAACAGTTAC	CAGTATATAAGAGGATATTGTGTT	C/G	4
SmaSNP_242	Importin alpha protein	1572	4	1424	ACGTTGGATGGCAGGTCAAAGACGCTAAAG	ACGTTGGATGTTTCCATCTCACCGAGCTTC	AAAGTAATTCTGGTCATACTGG	A/G	5
SmaSNP_243	ce ceroid-lipofuscinosis neuronal protein 5	1713	10	780	ACGTTGGATGGGATCTATTACGAGACGTGG	ACGTTGGATGTGGGAGCAGTCGTAAGACTC	CCCCGGCCCCAACGCCACG	G/T	4
SmaSNP_244	SSU rRNA; | Psetta maxima (turbot)	1139	4	754	ACGTTGGATGCATCCAGGACTGCTGAAATG	ACGTTGGATGGCATCAGTACCAGATGTCAG	agaacTGAAGCCACGTCCTGCTG	C/T	1
SmaSNP_245	Chromobox protein homolog 3	1230	13	118	ACGTTGGATGTGCGATAGCCCAGGTTTTTG	ACGTTGGATGAAGATGCTGCCTTTACCACG	CGCCAGAGATAAAGAGGTG	G/T	3
SmaSNP_246	Transmembrane protein 208	1781	2	314	ACGTTGGATGTGGCTAGATTTATGGCAGCG	ACGTTGGATGATCTACGAGGAGAATGAGGC	aAGCGAATATCGCATTAGCTCC	A/C	3
SmaSNP_247	Ribosomal protein L18a	784	3	274	ACGTTGGATGTGAGGATCTTCGCCAACAAC	ACGTTGGATGTCTTCATCTTCCTCAGCTGG	gctCCAACAACCATGTTGTGGC	A/C	5
SmaSNP_248	Pre-mRNA-processing factor 19	2454	1	1840	ACGTTGGATGATCTGAGCTAACTTTGCTTC	ACGTTGGATGGCTGCTGTGGTTTCAATGAG	TTGCTTCTTTAGTGTGTTAGTTGTCA	C/T	1
SmaSNP_249	Alpha-L-fucosidase	1476	7	1136	ACGTTGGATGTCTGAAACTGGAGGCTGTTC	ACGTTGGATGTTAAGTCCCAAATGCGAGCC	CAGTGAGCCTGAAACACCTC	A/G	6
SmaSNP_250	Protein phosphatase 2 (Formerly 2A)	3328	1	2340	ACGTTGGATGAAAGCAGATGGAGCAGCAAG	ACGTTGGATGCTCTGGGAAGATGAGCTATC	aTGTTTGTTTTCACTGAGCTTCCTCCC	A/G	3
SmaSNP_251	Solute carrier family 25 (Mitochondrial carrier; dicarboxylate transporter), member 10	2479	2	994	ACGTTGGATGGCGGTGGAATGAATTAAAGG	ACGTTGGATGGCAGTTTAACACCAGATTTC	cccccAAATTTTAACTCGCAAGTGG	A/C	6
SmaSNP_252	LON peptidase N-terminal domain and RING finger protein 1	2699	6	1963	ACGTTGGATGCGAAAGAACGACAATCCACG	ACGTTGGATGGGCACACACAATGGCCAATC	cTAAGTTTCTTCCATGTCGTC	G/T	3
SmaSNP_253	IK cytokine	2073	10	1235	ACGTTGGATGAGAGAGAGAGAACGTGAGAG	ACGTTGGATGCCACTCGAGGTTTCTCAAAG	ggCAAGGAGGAGGACATCAA	A/G	4
SmaSNP_254	Mki67 (FHA domain) interacting nucleolar phosphoprotein	1873	1	697	ACGTTGGATGAGCAGCTCGAGAAGATGAAG	ACGTTGGATGAAGTCGTATTCGATGCCGTG	tgggCTCCTGCGGAAAGAAAC	A/G	6
SmaSNP_255	General transcription factor IIIA	1429	44	477	ACGTTGGATGACAGCTGAAAGGCCTCTTGC	ACGTTGGATGCTGTGACAAAAAGTTCACCG	AGCACGTGGTTCTCGAAA	C/T	3
SmaSNP_256	Ribonuclease UK114	2168	5	498	ACGTTGGATGCGTCAACGATGTGTACAAGC	ACGTTGGATGTTCAATCTCGACCAGTCCAC	AAGCAGTTCTTTAGCAGTAGCTATCC	C/T	1
SmaSNP_257	Inner centromere protein	2946	11	589	ACGTTGGATGGAGTACACCTGTTGGGAAAG	ACGTTGGATGAGTGATGGAGTACGACTGTG	TGGGAAAGGTGGTGGCCTCAA	A/G	6
SmaSNP_258	Ubiquitin (Ribosomal protein L40)	1593	2	864	ACGTTGGATGTGTTGTAGTCAGACAGGGTG	ACGTTGGATGTCCAGGATAAGGAAGGCATC	aTTGCTTGCCGGCGAAGATCA	C/T	1
SmaSNP_259	Beta-galactoside-binding lectin	1121	2	569	ACGTTGGATGGTCAGCCTTACATGCTTATC	ACGTTGGATGATCTGCACATGTCAACAGGC	tCCTTACATGCTTATCACTTATTTACG	C/T	3
SmaSNP_260	Enoyl-Coenzyme A hydratase	2017	1	1151	ACGTTGGATGGTCAAATCCAAACCTCCACC	ACGTTGGATGGGGTAGATGAGTACTGTGTC	CCCACTGGACTCAAATCTAAT	A/T	5
SmaSNP_261	Sept2 protein	2364	2	1741	ACGTTGGATGTGCGTGAACCCTGTATGATG	ACGTTGGATGGCCATTGGCTCAATATTGTC	gaTTGTGTGGTCATCTGAAAT	A/G	5
SmaSNP_262	DNA-directed RNA polymerase I subunit RPA34	1689	4	715	ACGTTGGATGAACAGCGATTCCACCCCTTC	ACGTTGGATGTTGTAGATGAAGGCCCGAAG	ACCTGCGTGGCAGAAAATGAGGC	A/G	3
SmaSNP_263	Epithelial membrane protein 2	2051	10	654	ACGTTGGATGTCACGTTCATCTCCTCCATC	ACGTTGGATGTTGGAGCGAGCACTAGTGTC	TATTTTGTGCTACGCAAAAAGACAGC	A/G	3
SmaSNP_264	Retinol dehydrogenase 3	1519	3	436	ACGTTGGATGGTAACCTTCTTGCGAGACAC	ACGTTGGATGCTCATCCTCACCTTTCTCAG	TGGACAAGCTGGGCTTCC	C/G	6
SmaSNP_265	WD repeat-containing protein 54	2791	1	709	ACGTTGGATGTTACCCCCTAAGCTCATTCC	ACGTTGGATGTATCTTCTACCTCCACATCC	accccTTCCAGGCAAATTGCTG	A/G	1
SmaSNP_266	tRNA pseudouridine synthase 3	1406	5	804	ACGTTGGATGAGTACAGCATGGCGGTAGAC	ACGTTGGATGCAGTCTCCTGTTTCCAGTTC	aTGCTGTACGACTGCCACTT	C/T	1
SmaSNP_267	Transmembrane protein 167 precursor	1143	2	506	ACGTTGGATGACAGGTCTCCCGTTTTTTAC	ACGTTGGATGGGCATGAACAATACGATCCC	GGTCTCCCGTTTTTTACATTATCTA	G/T	2
SmaSNP_268	K11481 aurora kinase A	2442	13	952	ACGTTGGATGTCAACAGCTCGGCGATTAAG	ACGTTGGATGGCAAGATATCAAGGGTGGAG	gGTTTTTGGCTCCAGCGCTGATA	C/T	6
SmaSNP_269	Fish virus induced TRIM protein	3152	23	306	ACGTTGGATGGCTGATTCTCTTCCTGGAAC	ACGTTGGATGTTTCTGCGCCATTTCACCTC	GATGGGTGGAAACAACAGTCGTTC	C/G	3
SmaSNP_270	Flotillin-1	1679	2	1547	ACGTTGGATGCGTACGACTTTCACACTATG	ACGTTGGATGATCTTTTACGTTCCCTAAC	TCAATTTAAAAGATAAACATGCAA	C/G	5
SmaSNP_271	NAD(P)H dehydrogenase quinone 1	1261	7	1013	ACGTTGGATGATCTCACATCACAACTGCGG	ACGTTGGATGAGAGGGCGTGAAGGTAAGG	gggGCCCGAATGCAAGGCCTGCTGGA	A/G	5
SmaSNP_272	Tyrosine 3-monooxygenase	3035	3	842	ACGTTGGATGCGTTTAACTCACACCAACAC	ACGTTGGATGCGCTCCCATGTCATTTATCC	AAGAGAAAGTTCTAAACGGA	A/T	1
SmaSNP_273	Ubiquitin protein ligase E3 component	3015	3	2419	ACGTTGGATGGCGTAAAGGATGTCATGCAC	ACGTTGGATGTCGTGCATCATCTAGTTGTG	caAAGTTTGATAATTTTGTAATGTTG	C/T	2
SmaSNP_274	K13213 matrin 3	2406	3	1871	ACGTTGGATGGCCACTTCCCACATGATCTG	ACGTTGGATGGGTCAAACAGAAGGACAAAC	TGGTAAAAAATAATATATTCCAAACA	C/G	6
SmaSNP_275	Dolichol-phosphate mannosyltransferase	1308	4	836	ACGTTGGATGTATTCAGAAGCAGAGGGAGG	ACGTTGGATGAGCCATATACGCCTCCATTG	gGAAGCAGAGGGAGGCTAACTACGAC	A/G	2
SmaSNP_276	DNA-directed RNA polymerases i II and III subunit rpabc1	1199	4	877	ACGTTGGATGGCGATATGGACGATGAAGAG	ACGTTGGATGAGCTGCATGATGGTTTTGCG	TGGACGATGAAGAGGAAACATACAGA	A/G	1
SmaSNP_277	Syndecan 2	3478	1	2308	ACGTTGGATGAGGAAATGCCTGTATCCATC	ACGTTGGATGTTTAGTGACATTATTGGGG	CTCAAAGTCAACAAACTCC	A/C	6
SmaSNP_278	Peptide methionine sulfoxide reductase	1593	6	1015	ACGTTGGATGTTGGCTTTTAGATCGGAAGG	ACGTTGGATGCGATGCGACAAAAACACGAG	gTGGCTTTTAGATCGGAAGGAATCAC	C/G	3
SmaSNP_279	Methyltransferase-like protein 21D	1789	12	209	ACGTTGGATGGCTTCACTTTTAAGGCACGG	ACGTTGGATGTTCCTGTCGCGGCCAACAT	aTCGACTTCTCTCACAAAATATTC	G/T	4
SmaSNP_280	RNA-binding protein 8A	1144	9	181	ACGTTGGATGATCCATAGGAAAGTCCTCGC	ACGTTGGATGGTATCAACGCAGAGTACGGG	CCCGCTTCGTGAAGATCCAG	G/T	4
SmaSNP_281	Phosphatidylinositol transfer protein beta isoform-like isoform 2	3870	1	789	ACGTTGGATGAGCTGTACATTCGCAAGCAC	ACGTTGGATGAAGCAGAGCAAACTGTCCAC	CAAGCACAGATGAGGTA	C/T	1
SmaSNP_282	Zona pellucida protein C	2096	2	596	ACGTTGGATGAAGGCTAACGACGTCATATC	ACGTTGGATGCCTCATTTGTGGGTGGTTTC	TCATATCAAATGAGTTTCCTGA	A/T	2
SmaSNP_283	AP-2 complex subunit alpha-2-like	2884	2	1584	ACGTTGGATGGTGCAAAAAGTCAGTTTGGG	ACGTTGGATGCGTGTCAAATTTAAGCACAAC	cGTTTGGGTGCTATCATTG	G/T	1
SmaSNP_284	Apoptosis regulator BAX	2710	5	343	ACGTTGGATGCCTGATCACAGAGGTCATTG	ACGTTGGATGTTACTTTCGCAGAGGCAAGG	AGGATATGCCCGCGGAG	A/G	1
SmaSNP_285	Borealin	1493	1	979	ACGTTGGATGCTCTTTTTGACGTAGTCGGG	ACGTTGGATGCCAGCTCAGAGGATGAAAAC	tTGTTGCTCTCCCCTTCTTCGTTAT	G/T	3
SmaSNP_286	Brain protein 44	1883	3	535	ACGTTGGATGCGGCCATGGTTTGACGTTAG	ACGTTGGATGACAGTCGTCCTTCAGCAGAG	GAGCAGTGGGTGTAGCGTGTT	C/T	3
SmaSNP_287	Exosome component 8	1784	1	1351	ACGTTGGATGCGATTACATCGGCGATGAAC	ACGTTGGATGTGTGTTCGTCTCGGTTCCGT	gggGAACTGGCTGGCAGCCTGG	A/G	5
SmaSNP_288	Atrophin-1 domain containing protein	2418	2	1951	ACGTTGGATGCCCAGAACGTATATTGGAGG	ACGTTGGATGTGAATCTATGTGCAGGGCAG	GTATATTGGAGGAAGCCT	G/T	4
SmaSNP_289	similar to connectin/titin	1685	1	727	ACGTTGGATGCGTTATCATTATTGCTCACTG	ACGTTGGATGGGCTCAGGTGAAACCAATAG	TCACTGAAACATTGTTGAC	A/T	5
SmaSNP_290	Ubiquitin carboxyl-terminal hydrolase L5	2084	7	984	ACGTTGGATGGAATCCGTTGTTCACTTGGC	ACGTTGGATGACCAGCAGCTAATACCCTTG	GCGCTTTGTTTCTCCTT	C/T	2
SmaSNP_291	Replication factor A2	1214	2	208	ACGTTGGATGACTTGAGAGGCGGACAGAAG	ACGTTGGATGAGTCACAGTGCGGTGACATC	GGGCAGAATCTGAAGAG	A/G	3
SmaSNP_292	Histone deacetylase complex subunit SAP18	838	3	664	ACGTTGGATGGCCTTTCTGAACACGCATAC	ACGTTGGATGTCCAAGATGATGCAAAAGAG	tacacACACATGTAAACACAAAGCAA	C/T	2
SmaSNP_293	Replication protein A 14 kDa subunit	750	1	248	ACGTTGGATGGTTTGTTGATGTGCTGCGAC	ACGTTGGATGACAGCCAAGAGACTGTGAAC	gggtgTGGGGACATCCAGTATT	C/G	6
SmaSNP_294	Vacuolar protein-sorting-associated protein 25	1299	7	252	ACGTTGGATGTGTCGTGTTCTGGGAATTTC	ACGTTGGATGAGAATTAGCTCCCGACCTTC	GGGAATTTCTTTGAGATGACT	A/G	7
SmaSNP_295	Nucleolar protein family A, member 3	728	13	261	ACGTTGGATGGCGACAGAATCGATCAAATG	ACGTTGGATGCACGTGGAATCGAAAGGAAG	GATCAAATGTCGTCGATC	C/T	7
SmaSNP_296	Carbonic anhydrase	1615	2	412	ACGTTGGATGTTGCCATCCACAGTGTGCTC	ACGTTGGATGCCTACAACAGCCTGCAGTTC	GTGTGCTCAGATCCAGGGAC	G/T	6
SmaSNP_297	UPF0414 transmembrane protein	1957	3	1433	ACGTTGGATGTCTAATCGCTGCCCTTAACC	ACGTTGGATGTTCGAGCAATATCTGATGCC	TGCCAGTCTGCTGTTATGAAG	C/T	4
SmaSNP_298	Queuine tRNA-ribosyltransferase	1605	1	120	ACGTTGGATGCACACCACACTTCAGAAAGC	ACGTTGGATGTTTTGTCACTGAGCACTCCG	CACTTCAGAAAGCCAAATG	C/T	2
SmaSNP_299	NHP2-like protein 1	1091	3	305	ACGTTGGATGTCTGTTCAGGGTTTTGGTGG	ACGTTGGATGTGACCAAAACCATCCTGGAC	CCCTTCCGCAGCTGCTTGTAGTT	C/G	3
SmaSNP_300	Histone-lysine N-methyltransferase SETD8-A	1941	3	276	ACGTTGGATGAAAGGAAACGAACCAGCGAC	ACGTTGGATGTTTGCTTGGACTCCGTAGAC	AGGATTGTATAGGCAAGG	C/T	1
SmaSNP_301	Zona pellucida glycoprotein 2	1615	3	220	ACGTTGGATGTAACCCTGGGCAGAAACATC	ACGTTGGATGTGGTCAATGCCAACATGGAG	GGCAGAAACATCACAAAT	A/G	2
SmaSNP_302	Fast skeletal myosin light chain 2	1924	14	976	ACGTTGGATGGAACGGAGGTAGAGATCTTG	ACGTTGGATGAGAACATCTGCTACGTCATC	cGATGATTTACTCTTCCTTGTCTTCTC	A/G	2
SmaSNP_303	Astacin like metallo-protease	1546	13	831	ACGTTGGATGAAAACGGCTGCTTGTACACG	ACGTTGGATGTTTACGTAGGAGTCCCTGTC	GAGCACGGTGCAGCACGAGG	C/T	2
SmaSNP_304	Microsomal glutathione S-transferase 3	1445	2	553	ACGTTGGATGATCATCCCGAGCAAAGCCAG	ACGTTGGATGAGAGAGGTGTATGCACATGG	AAAGCCAGGTTGCCAAA	A/G	4
SmaSNP_305	Actin related protein 2/3 complex subunit 4	1117	5	637	ACGTTGGATGACTCCTTTAGTTCTCCACCC	ACGTTGGATGCAATGTTTGTCTGTGGTCCC	cGTTCTCCACCCTTATGCTGATTG	C/T	1
SmaSNP_306	Cyclophilin B	1438	1	1304	ACGTTGGATGATGCTCGTTGGTGAATGGAC	ACGTTGGATGCCATCTGAACGCACTAGAAG	gGTTGTGTCAGTGTCATGATTG	C/G	1
SmaSNP_307	Dynein light chain Tctex-type 3	2189	4	220	ACGTTGGATGTCCACTTGTTCACCAGACTC	ACGTTGGATGACTCTGAGGAGGCTGATAAC	GACTCTGGCTGTAGTCGTCAGCGCC	C/G	3
SmaSNP_308	Ependymin-1	1203	19	222	ACGTTGGATGGAATGACAAGGCTGATGGTG	ACGTTGGATGGAAGATGTCTGCAGCTGTTG	GGGTGGCGGCAGTGAAGCA	A/G	5
SmaSNP_309	C-4 methylsterol oxidase	1642	3	421	ACGTTGGATGCAACCACTTCTGTATCCAGC	ACGTTGGATGCCCAGTCGTATGGGATGTTG	aCACTTCTGTATCCAGCTGCCTTT	A/G	2
SmaSNP_310	Dynein light chain LC8-type	1309	50	533	ACGTTGGATGGATAACAAGACTGCAGCAAG	ACGTTGGATGCATTTGCTACCACGTTCCTG	cGACTGCAGCAAGCAGGAAA	G/T	5
SmaSNP_311	Rho-related GTP-binding protein RhoF	4885	1	1227	ACGTTGGATGGGTTTCTTTTCCACCAGCAG	ACGTTGGATGCAGTTAGCTCTTTTCTAGTC	gtcTTCGAAACTTATCTTCGAAA	A/T	5
SmaSNP_312	Golgi SNAP receptor complex member 1	1483	6	287	ACGTTGGATGTGTTCATGATTTTGTATCC	ACGTTGGATGGTCATACATCTTTAAATTCTC	TCTATTGTGATTCACTTTACAT	A/T	4
SmaSNP_313	Glycine cleavage system H protein	1040	3	426	ACGTTGGATGTGAGGTCAACACACTACTGG	ACGTTGGATGATCTTCATCAGCCAGCCATC	ctTCAACACACTACTGGCAGACAACCC	A/T	5
SmaSNP_314	Ribosomal L1 domain-containing protein 1	1639	2	744	ACGTTGGATGGCATGAAAGGACAAGTGATG	ACGTTGGATGGAGAGATGAGGTGTAGATGG	cAGATCATCCATATAAAGAGTCAATC	A/G	4
SmaSNP_315	N-alpha-acetyltransferase 50	1939	2	1369	ACGTTGGATGGGGAATTAACAGGCTGGAA	ACGTTGGATGACGAAAGGAAGGCTCAAAGG	AGGCTGGAAAATAGTTAATTCA	A/T	2
SmaSNP_316	Oncogene DJ-1 isoform 1	1051	11	783	ACGTTGGATGAGCTTGCTCACTACTGAGAC	ACGTTGGATGTATACCCCTTATGATCCCCG	ACAGCAAATCCAGCGTAGC	C/T	4
SmaSNP_317	Wu:fj40d12 protein n = 7 Tax = Euteleostomi RepID = A3KP21_DANRE	1969	7	645	ACGTTGGATGAGGATAAACATCTCTTGGAC	ACGTTGGATGGCATCTGAATTCTGATGTTG	tACATAATAACGACTCAAATATTG	A/G	2
SmaSNP_318	Mucin multi-domain protein	2518	7	1380	ACGTTGGATGCACTTTTACACAATGCGGAG	ACGTTGGATGTTGTAAAGAAATTGCACAG	TTCTTTTCTTTTTTAGCACTAC	C/G	2
SmaSNP_319	Adenosine kinase	2437	3	400	ACGTTGGATGTAGTGACCCATTACCAAACC	ACGTTGGATGGCATTTTATTGGTGGAGCTT	CCATAGAAACTTCTCAGACC	A/G	1
SmaSNP_320	No homology found	2396	6	1559	ACGTTGGATGAGGGAAAGAGCCTTTACTTC	ACGTTGGATGTCAAAGGAAGCTCGAAGCTG	GCCTTTACTTCCTTCTCTT	A/G	2
SmaSNP_321	Zymogen granule membrane protein 16	1263	5	593	ACGTTGGATGCCCACTGTTACATTGTTCCG	ACGTTGGATGCTGGGTGATGATCTACTATTG	CAGAGAACTGATTGATCCT	A/G	3
SmaSNP_322	6-pyruvoyl tetrahydrobiopterin synthase	1175	1	549	ACGTTGGATGAGTGACCTCGCCTTAACAAG	ACGTTGGATGCTCTTGCACTTTATACACTC	TTAACAAGAATACAAATTCGAC	C/T	6
SmaSNP_323	Proteasome subunit beta	1591	2	1286	ACGTTGGATGGTACGAAGGGTTTGCTTGTC	ACGTTGGATGCCTTCACTTGGGCTTTACTC	gCTGCTGTTGAGCAGCCGAAGAAT	C/T	2
SmaSNP_324	RING finger protein 4	1061	11	384	ACGTTGGATGCATAGCCTTCAGTGTTGTCC	ACGTTGGATGAACAGAGCAACGAAGAGGAC	tAGTGTTGTCCATCACAT	A/G	1
SmaSNP_325	Lipocalin	1653	1	551	ACGTTGGATGCCACACCATCAAGACAAAGG	ACGTTGGATGCTTCTGCTGCAGGTTATCAC	GACAAAGGATGGAGTGTCC	C/G	7
SmaSNP_326	Choline transporter-like protein 2	3125	5	680	ACGTTGGATGCGTCCACTAAATGGTGTGAG	ACGTTGGATGCATTCCCACTGAAACCAGAC	tGTGTGAGCCTGAGCGAGG	A/G	2
SmaSNP_327	small nuclear ribonucleoprotein polypeptide A'	1151	1	298	ACGTTGGATGGGGTGTCTCCATTTGTTCAG	ACGTTGGATGAGGCCGAGATCTGAGACAAG	aaTCCTCTTCTTCCACCAGGTCA	A/G	4
SmaSNP_328	RNA-binding proteins (RRM domain)	1460	5	647	ACGTTGGATGCAACCATACTGAAAGCAACC	ACGTTGGATGCATCAACCTTCAGAGAGGAG	TTGGTATTGTAGGACATTCAACCCT	C/T	4
SmaSNP_329	Type II keratin	2399	16	617	ACGTTGGATGCTGGCCCTTGTGTATTTGAG	ACGTTGGATGGGGATCACTTGCTGTTTTTC	TGTGTATTTGAGGCCATGTTTAC	C/G	3
SmaSNP_330	Novel protein similar to vertebrate thyroid hormone receptor interactor 12 (TRIP12)	2191	4	1539	ACGTTGGATGTTTGGAACAGCACTTGACAC	ACGTTGGATGCGGTTGTCACTTTTTTCCCC	tCTACACACAGATAAATTATACATC	C/T	5
SmaSNP_331	nucleotide-binding oligomerization domain containing 2-like	2144	22	950	ACGTTGGATGACAACTGGAGAGCAACACAC	ACGTTGGATGAACATCTTCAGACCACCACG	AGCAACACACATTGACA	G/T	5
SmaSNP_332	Ribosomal protein S6 kinase	3056	12	157	ACGTTGGATGGTGCTGTGGCTGAATAATCC	ACGTTGGATGGAGAGTTTTGCCACCAAACA	TCCATGAACCAGCTGTC	A/C	6
SmaSNP_333	Transmembrane 6 superfamily member 2	2386	3	434	ACGTTGGATGGGTGATTCATGCAGATTCCC	ACGTTGGATGTGTGGCCGACCTGTATATTC	CATGCAGATTCCCAAGATGT	A/T	3
SmaSNP_334	PREDICTED: hypothetical protein LOC100712283 [Oreochromis niloticus]	1711	3	444	ACGTTGGATGACCCCAAGTGAAATATCTGC	ACGTTGGATGGAATATTTTGGTCACGTCCT	CACTTCAGAGTCAAATTGTC	C/T	2
SmaSNP_335	SSU rRNA; | Gasterosteus aculeatus (three-spined stickleback)	1834	2	623	ACGTTGGATGCCTTCCAGCAAAATGCTGAG	ACGTTGGATGAGGCTCTATGAATGGACTGG	gGCTGAGTTAAAAAGAAAATACATC	A/G	5
SmaSNP_336	Trypsin 1	948	4	707	ACGTTGGATGCCAGTAAAAGAAACGACTCC	ACGTTGGATGGGTGGATGGATGTTTTGGAG	ccgacACGACTCCATAAATCTTGTCTT	A/G	6
SmaSNP_337	1-alkyl-2-acetylglycerophosphocholine esterase	2246	2	1694	ACGTTGGATGGAGCCACAGTCCTTTTCCAG	ACGTTGGATGCCTGCTTCTTAGAAGAAACC	tttgCCAGATAAACTATGTTCCAGT	C/T	6
SmaSNP_338	CD151 antigen	1488	5	933	ACGTTGGATGCAGTTACGTTGTGCACTGTC	ACGTTGGATGCCTTATGCGTCTTGGAAGTG	ggaAGATAATCTGAACAGGTTTTAG	C/T	6
SmaSNP_339	Arsenite methyltransferase 1	3560	2	2720	ACGTTGGATGCACGCTGTGAGCCAATGAAA	ACGTTGGATGAAGCAAGATGCTGTCCTGTG	GAGCCAATGAAATGAGGTC	A/T	4
SmaSNP_340	Receptor expression-enhancing protein 5	1539	58	437	ACGTTGGATGGCCTTTTCAGCATCGTTGAG	ACGTTGGATGACCATATCAGGAACAGGCAC	TTCTGGTTCCCCTTCTA	C/T	2
SmaSNP_341	Cathepsin S	3184	5	1391	ACGTTGGATGTGATATCAGGACACCCGTTG	ACGTTGGATGTCTTGTGGCTCTTGCTGGG	cTATCAGGACACCCGTTGACTTCTT	C/G	4
SmaSNP_342	Trans-1,2-dihydrobenzene-1,2-diol dehydrogenase	1454	3	1250	ACGTTGGATGCCACACCGAGTCGATAAAAG	ACGTTGGATGTCTTCCTCAGGTTTTGACTC	gCCGAGTCGATAAAAGAGAAAGTTT	A/G	3
SmaSNP_343	High mobility group protein 2	1626	1	945	ACGTTGGATGAGTCCGCACAGAACAGAAAG	ACGTTGGATGAAGGGCCAGAAGAATAAGCG	aAGACGGTGGTCTCTTGGGGGCATT	G/T	4
SmaSNP_344	Transferrin 1	2136	4	677	ACGTTGGATGGGAGAACACTGGTGCTAATG	ACGTTGGATGCCATTTCAGGGCAGATCAAC	GGCTAAAGGCAGTAAGTC	A/C	5
SmaSNP_345	Argininosuccinate synthase	2190	5	1901	ACGTTGGATGCCAGCACCAAAAAGTAACAG	ACGTTGGATGGCTTAAGACACAGTGGAGAG	cccatTAACAGTTGCTGCCCTGC	A/T	6
SmaSNP_346	ATP-binding cassette, sub-family A (ABC1)	3055	1	1070	ACGTTGGATGCTCAATCTCACGTCGTTACC	ACGTTGGATGCTGGCGCAATAGCATGTTTT	aacctTTACCAAGTTTTATAATGCGA	C/T	5
SmaSNP_347	Myomesin 1a (skelemin)	3283	2	2497	ACGTTGGATGTCTTGTGTACAGCTGCTTCC	ACGTTGGATGTCACTGTTTGCCTCCTTGAC	cttctAGCTGCTTCCCTCCCTG	C/T	3
SmaSNP_348	Retinoic acid receptor responder protein 3	1762	3	934	ACGTTGGATGCAAGCATTTATGAGTAAGC	ACGTTGGATGCTGAAGAATGTAGTGCATCG	agAAGCAACAAATGATGTCTG	A/G	4
SmaSNP_349	Nucleophosmin 1	4172	3	2545	ACGTTGGATGGTCGTAACGTGTGAGAGTAG	ACGTTGGATGGTGTGTGTACTGAACTTAG	TGAGAGTAGTAATTACAGTGGTCA	A/C	6
SmaSNP_350	Myosin, heavy polypeptide 1	2357	31	1199	ACGTTGGATGTCTGGAACAGACAGAGAGAG	ACGTTGGATGAGGCTTGTGTTCTGAGAGTG	GATGCCAGTGAGCGTGT	G/T	2
